# Supplementary material for: Post-TPT Risk of Tuberculosis Among Household Contacts: A Multistate Observational Cohort Study from India
Source: Research Square preprint supplement (doi:10.21203/rs.3.rs-8176310/v1), 2025-12-01
Supplement: Supplementary file 1 [file 201217e21b9ab5ce48f3cd19.docx]

**Questionnaires used – First & Second Follow Up**

| **Section** | **Question** | **Response/Options** | **Type** |
| --- | --- | --- | --- |
|  | **State Name** | Shared with Sample |  |
|  | **District Name** | Shared with Sample |  |
|  | **Operational TU** | Shared with Sample |  |
|  | **Index Patient ID** | Shared with Sample |  |
|  | **Address** | Shared with Sample |  |
|  | **HH Contact Id** | Shared with Sample |  |
|  | **First Name** | Shared with Sample |  |
|  | **Last Name** | Shared with Sample |  |
|  | **DOB** | Shared with Sample |  |
|  | **Age Category** | Shared with Sample |  |
|  | **Gender** | Shared with Sample |  |
|  | **Primary Contact Number** | Shared with Sample |  |
|  | **TPTC assigned** | Shared with Sample |  |
|  | **Date of Screening** | Shared with Sample |  |
|  | **Date of TPT initiation** | Shared with Sample |  |
|  | **Regimen type** | Shared with Sample |  |
|  | **Outcome Date** | Shared with Sample |  |
| **Main Sheet** | **TPTC assigned for Follow-up** | To be assigned by state/district | **Mandatory** |
|  | **TPTC Name** |  | **Mandatory** |
|  | **TPTC Phone Number** |  | **Mandatory** |
|  | **No of Follow-up** | 1st Follow-up | **If selected, opens loop for 1st Follow-up** |
|  |  | 2nd Follow-up | **If selected, opens loop for 2nd Follow-up** |
| **1st Follow up details** | **Date of 1st follow up (11th month)** | DD-MM-YYYY | **Mandatory** |
|  | **Respondant** | Self | **Mandatory & Single response** |
|  |  | Mother |  |
|  |  | Father |  |
|  |  | Sibling |  |
|  |  | Other relative |  |
|  |  | Neighbour |  |
|  |  | Others |  |
|  | **Name of the respondent** |  | **Mandatory** |
|  | **Highest level of education** | Secondary level | **Mandatory & Single response** |
|  |  | Higher secondary level |  |
|  |  | Graduate and any other higher qualification |  |
|  | **HHC's Occupation** | Student | **Mandatory & Single response** |
|  |  | Homemaker |  |
|  |  | Clerical and Sales worker |  |
|  |  | Agricultural employee on others' land |  |
|  |  | Self-employed agricultural worker/agricultural worker on own land |  |
|  |  | Household and domestic services worker |  |
|  |  | Skilled labour |  |
|  |  | Unskilled labour |  |
|  |  | Services worker/Salaried employee |  |
|  |  | Currently not working |  |
|  | **Type of house** | Kachha | **Mandatory & Single response** |
|  |  | Semi-pucca |  |
|  |  | Pucca |  |
|  | **Type of cooking fuel used by the household** | Clean fuel (electricity, liquid petroleum gas, natural gas, or biogas) | **Mandatory & Single response** |
|  |  | Unclean fuel (Cow dung cakes, firewood, kerosene, grass and others) |  |
|  |  | Use of both clean and unclean fuels |  |
|  | **Previous/ current history of illness** | Diabetes | **Mandatory & Multiple response** |
|  |  | Hypertension |  |
|  |  | Cardiovascular disorders |  |
|  |  | Brochial Asthma and other brochial diseases |  |
|  |  | Chronic kidney diseases/Renal impairment/Dialysis |  |
|  |  | Chronic liver diseases |  |
|  |  | Cancer |  |
|  |  | Organ transplantation/On Immunisupressant therapy |  |
|  |  | Sillicosis/Asbestosis |  |
|  |  | None |  |
|  | **Social risk factors/High risk population** | Migrant | **Mandatory & Multiple response** |
|  |  | Factory/Conctruction worker/Brick kiln worker |  |
|  |  | Miner |  |
|  |  | Health care worker |  |
|  |  | Urban slum dweller |  |
|  |  | Prisoner |  |
|  |  | Refugee |  |
|  |  | Tribal population |  |
|  |  | Not applicable |  |
|  | **History of habits** | Tobacco use | **Mandatory & Multiple response** |
|  |  | Alcohol consumption |  |
|  |  | No habits |  |
|  | **Previous history of TB** | Yes/No | **Mandatory & Single response** |
|  | **Have you completed the entire prescribed course of TB preventive Treatment?** | Yes/No | **Mandatory & Single response** |
|  | **Total no. days of TPT taken (complete =>80%)** | Number | **Mandatory** |
|  | **Do you currently experience any of the following?** | Current symptoms: Recurrent & Persistant Cough | **Mandatory & Multiple response, If marked as "No current symptoms", Attempt next question** |
|  |  | Current symptoms: Severe Unintentional Weight Loss |  |
|  |  | Current symptoms: Night sweats |  |
|  |  | Current symptoms: Fever |  |
|  |  | Current symptoms: Other symptoms |  |
|  |  | No symptoms |  |
|  | **If No symptoms currently (in previous question) - Since completion of TPT did you experience any of the following?** | Previous symptoms: Persistant Cough | **Attempt only if previous question marked as "No current symptoms" & Multiple response.** |
|  |  | Previous symptoms: Severe Unintentional Weight Loss |  |
|  |  | Previous symptoms: Night sweats |  |
|  |  | Previous symptoms: Fever |  |
|  |  | Previous symptoms: Other symptoms |  |
|  |  | No symptoms |  |
|  | **If "YES" for any symptoms, Maximum duration of any/all symptoms (in days)** | Maximum duration of any/all symptoms (in days) | **Attempt only if any symptoms (Current or Previous) is marked as "YES"** |
|  | **Name of symptom marked in"Maximum duration"** | Severe Unintentional Weight Loss/Recurrent & Persistent Cough/Night sweats/Fever | **Attempt only if any symptoms (Current or Previous) is marked as "YES"** |
| **Care&Rx sheet** | **If "YES" for any symptoms, was medical consultation done (Check prescriptions/records) If "YES" go to sheet CARE&RX, if "NO" then update follow-up status on MAIN sheet** | Yes/No | **Attempt only if any symptoms (Current or Previous) is marked as "YES". If "NO" then update follow-up status on MAIN sheet and close** |
|  | **If "YES" for any symptoms, medical consultation was done, Was a TB diagnostic test prescribed?** | Yes/No | **Mandatory if Medical consultation was done and marked as "YES" and single response** |
|  | **If "YES" for TB diagnostic test prescribed, Was TB diagnostic test undertaken?** | Yes/No | **Mandatory if TB diagnostic test was prescribed and marked as "YES" and single response** |
|  | **Name of Test** | CBNAAT/CXR/AFB/FNAC/Other | **Mandatory if TB diagnostic test/s was undertaken and marked as "YES" and multiple reponse** |
|  | **Date of TB diagnostic Test** | DD-MM-YYYY | **Mandatory if Name of test is NOT BLANK** |
|  | **TB diagnostic Test Result** | Positive/Negative | **Mandatory if Name of test is NOT BLANK** |
|  | **Report upload** | To be uploaded by TPTC | **Mandatory if Name of test is NOT BLANK** |
|  | **Diagnosed as TB** | Yes/No | **Mandatory if Name of test is NOT BLANK** |
|  | **HHC Initiated on ATT** | Yes/No | **Mandatory if Name of test is NOT BLANK** |
|  | **Date of ATT Initiation** | DD-MM-YYYY | **Mandatory if HHC initiated on ATT is "YES"** |
|  | **Nikshay ID** | Number | **Mandatory if HHC initiated on ATT is "YES"** |
|  | **Status After Follow-Up** | **1. Follow up not done** | **Mandatory & Single response** |
|  |  | **2. Follow up done, No TB Symptoms** |  |
|  |  | **3. Follow up done,  TB Symptoms,  No Medical Consultation** |  |
|  |  | **4. Follow up done,  TB Symptoms,  Pending Medical Consultation/test/result** |  |
|  |  | **5. Follow up done,  TB symptoms,  Not Diagnosed as TB** |  |
|  |  | **6. Follow up done, TB diagnosed,  Not yet started on ATT** |  |
|  |  | **7. Follow up done,  TB diagnosed and  started ATT** |  |
|  |  | **8. Follow up done,  HHC died** |  |
|  | **Any Feedback/Remark** |  |  |
| **2nd Follow up details** | **Date of 2nd follow up (17th month)** | DD-MM-YYYY | **Mandatory** |
|  | **Respondant** | Self | **Mandatory & Single response** |
|  |  | Mother |  |
|  |  | Father |  |
|  |  | Sibling |  |
|  |  | Other relative |  |
|  |  | Neighbour |  |
|  |  | Others |  |
|  | **Name of the respondent** |  | **Mandatory** |
|  | **Highest level of education** | Secondary level | **Mandatory & Single response** |
|  |  | Higher secondary level |  |
|  |  | Graduate and any other higher qualification |  |
|  | **HHC's Occupation** | Student | **Mandatory & Single response** |
|  |  | Homemaker |  |
|  |  | Clerical and Sales worker |  |
|  |  | Agricultural employee on others' land |  |
|  |  | Self-employed agricultural worker/agricultural worker on own land |  |
|  |  | Household and domestic services worker |  |
|  |  | Skilled labour |  |
|  |  | Unskilled labour |  |
|  |  | Services worker/Salaried employee |  |
|  |  | Currently not working |  |
|  | **Type of house** | Kachha | **Mandatory & Single response** |
|  |  | Semi-pucca |  |
|  |  | Pucca |  |
|  | **Type of cooking fuel used by the household** | Clean fuel (electricity, liquid petroleum gas, natural gas, or biogas) | **Mandatory & Single response** |
|  |  | Unclean fuel (Cow dung cakes, firewood, kerosene, grass and others) |  |
|  |  | Use of both clean and unclean fuels |  |
|  | **Previous/ current history of illness** | Diabetes | **Mandatory & Multiple response** |
|  |  | Hypertension |  |
|  |  | Cardiovascular disorders |  |
|  |  | Brochial Asthma and other brochial diseases |  |
|  |  | Chronic kidney diseases/Renal impairment/Dialysis |  |
|  |  | Chronic liver diseases |  |
|  |  | Cancer |  |
|  |  | Organ transplantation/On Immunisupressant therapy |  |
|  |  | Sillicosis/Asbestosis |  |
|  |  | None |  |
|  | **Social risk factors/High risk population** | Migrant | **Mandatory & Multiple response** |
|  |  | Factory/Conctruction worker/Brick kiln worker |  |
|  |  | Miner |  |
|  |  | Health care worker |  |
|  |  | Urban slum dweller |  |
|  |  | Prisoner |  |
|  |  | Refugee |  |
|  |  | Tribal population |  |
|  |  | Not applicable |  |
|  | **History of habits** | Tobacco use | **Mandatory & Multiple response** |
|  |  | Alcohol consumption |  |
|  |  | No habits |  |
|  | **Previous history of TB** | Yes/No | **Mandatory & Single response** |
|  | **Have you completed the entire prescribed course of TB preventive Treatment?** | Yes/No | **Mandatory & Single response** |
|  | **Total no. days of TPT taken (complete =>80%)** | Number | **Mandatory** |
|  | **Do you currently experience any of the following?** | Current symptoms: Recurrent & Persistant Cough | **Mandatory & Multiple response, If marked as "No current symptoms", Attempt next question** |
|  |  | Current symptoms: Severe Unintentional Weight Loss |  |
|  |  | Current symptoms: Night sweats |  |
|  |  | Current symptoms: Fever |  |
|  |  | Current symptoms: Other symptoms |  |
|  |  | No symptoms |  |
|  | **If No symptoms in previous question - Since completion of TPT did you experience any of the following?** | Previous symptoms: Persistant Cough | **Attempt only if previous question marked as "No current symptoms" & Multiple response.** |
|  |  | Previous symptoms: Severe Unintentional Weight Loss |  |
|  |  | Previous symptoms: Night sweats |  |
|  |  | Previous symptoms: Fever |  |
|  |  | Previous symptoms: Other symptoms |  |
|  |  | No symptoms |  |
|  | **If "YES" for any symptoms, Maximum duration of any/all symptoms (in days)** | Maximum duration of any/all symptoms (in days) | **Attempt only if any symptoms (Current or Previous) is marked as "YES"** |
|  | **Name of symptom marked in"Maximum duration"** | Severe Unintentional Weight Loss/Recurrent & Persistent Cough/Night sweats/Fever | **Attempt only if any symptoms (Current or Previous) is marked as "YES"** |
| **Care&Rx sheet** | **If "YES" for any symptoms, was medical consultation done (Check prescriptions/records) If "YES" go to sheet CARE&RX, if "NO" then update follow-up status on MAIN sheet** | Yes/No | **Attempt only if any symptoms (Current or Previous) is marked as "YES". If "NO" then update follow-up status on MAIN sheet and close** |
|  | **If "YES" for any symptoms, medical consultation was done, Was a TB diagnostic test prescribed?** | Yes/No | **Mandatory if Medical consultation was done and marked as "YES" and single response** |
|  | **If "YES" for TB diagnostic test prescribed, Was TB diagnostic test undertaken?** | Yes/No | **Mandatory if TB diagnostic test was prescribed and marked as "YES" and single response** |
|  | **Name of Test** | CBNAAT/CXR/AFB/FNAC/Other | **Mandatory if TB diagnostic test/s was undertaken and marked as "YES" and multiple reponse** |
|  | **Date of TB diagnostic Test** | DD-MM-YYYY | **Mandatory if Name of test is NOT BLANK** |
|  | **TB diagnostic Test Result** | Positive/Negative | **Mandatory if Name of test is NOT BLANK** |
|  | **Report upload** | To be uploaded by TPTC | **Mandatory if Name of test is NOT BLANK** |
|  | **Diagnosed as TB** | Yes/No | **Mandatory if Name of test is NOT BLANK** |
|  | **HHC Initiated on ATT** | Yes/No | **Mandatory if Name of test is NOT BLANK** |
|  | **Date of ATT Initiation** | DD-MM-YYYY | **Mandatory if HHC initiated on ATT is "YES"** |
|  | **Nikshay ID** | Number | **Mandatory if HHC initiated on ATT is "YES"** |
|  | **Status After Follow-Up** | **1. Follow up not done** | **Mandatory & Single response** |
|  |  | **2. Follow up done, No TB Symptoms** |  |
|  |  | **3. Follow up done,  TB Symptoms,  No Medical Consultation** |  |
|  |  | **4. Follow up done,  TB Symptoms,  Pending Medical Consultation/test/result** |  |
|  |  | **5. Follow up done,  TB symptoms,  Not Diagnosed as TB** |  |
|  |  | **6. Follow up done, TB diagnosed,  Not yet started on ATT** |  |
|  |  | **7. Follow up done,  TB diagnosed and  started ATT** |  |
|  |  | **8. Follow up done,  HHC died** |  |
|  | **Any Feedback/Remark** |  |  |
