# Supplementary material for: Post-TPT Risk of Tuberculosis Among Household Contacts: A Multistate Observational Cohort Study from India
Source: Research Square preprint supplement (doi:10.21203/rs.3.rs-8176310/v1), 2025-12-01
Supplement: Supplementary file 2 [file 7dff659b11aca8020069ad1b.docx]

**Supplementary Text**

This supplementary document presents additional analyses that support the thematic discussion points in the main manuscript. It includes a combination of tables and figures, which are referenced at relevant sections throughout the paper.

# Tables

#### Table S1

*Summary statistics for eligible cohort*

| **Characteristic** | **N = 78,647***1* |
| --- | --- |
| **Gender** |  |
| female | 40,893 (52%) |
| male | 37,737 (48%) |
| transgender | 17 (<0.1%) |
| **Age.Category** |  |
| <5 | 8,709 (11%) |
| >=5 | 69,938 (89%) |
| **State** |  |
| bihar | 6,100 (7.8%) |
| delhi | 9,233 (12%) |
| gujarat | 9,821 (12%) |
| haryana | 2,392 (3.0%) |
| jammu & kashmir | 257 (0.3%) |
| rajasthan | 10,387 (13%) |
| tamil nadu | 2,560 (3.3%) |
| uttar pradesh | 32,049 (41%) |
| uttarakhand | 5,848 (7.4%) |
| **Drug Regimen** |  |
| 3hp | 5,275 (6.7%) |
| 6h | 73,372 (93%) |
| **Type of Intervention Regimen** |  |
| CxR + Interferon Gamma Release Assay (IGRA) test | 3,571 (4.5%) |
| CxR only | 73,131 (93%) |
| CxR + Tuberculin skin test (TST) /Mantoux test | 1,945 (2.5%) |
| **Month of TPT completion** |  |
| October 2022 | 17,416 (22%) |
| November 2022 | 18,200 (23%) |
| December 2022 | 18,781 (24%) |
| January 2023 | 24,250 (31%) |
| *1* n (%) | |

#### Table S2

*Sampling details for State*

| **state** | **Total Household Contacts who completed TPT during this period** | **Sample required for 95% C.I. & 5% Margin of error** | **Actual Sample** |
| --- | --- | --- | --- |
| bihar | 6,100 | 362 | 400 |
| delhi | 9,233 | 369 | 400 |
| gujarat | 9,821 | 374 | 800 |
| haryana | 2,392 | 332 | 550 |
| jammu & kashmir | 257 | 155 | 200 |
| rajasthan | 10,387 | 371 | 400 |
| tamil nadu | 2,560 | 335 | 500 |
| uttar pradesh | 32,049 | 380 | 460 |
| uttarakhand | 5,848 | 361 | 480 |
| **Total** | **78,647** | **383*** | **4,190** |
| ***Note:*** *The total sample size required for the 78,647 HHCs who completed TPT is not merely the sum of individual state samples but a single calculated figure that ensures statistical significance for the entire population.  While our study is powered at granular levels, a sample size of 383 is needed for 95% confidence level, to achieve population-level significance. | | | |

#### Table S3

*Sampling details for State * Drug Regimen*

|  | **6H Drug Regimen** | | | **3HP Drug Regimen** | | |
| --- | --- | --- | --- | --- | --- | --- |
| **State** | **6H eligible** | **Sample required for 95% C.I. & 5% Margin of error** | **6H sampled** | **3HP eligible** | **Sample required for 95% C.I. & 5% Margin of error** | **3HP sampled** |
| bihar | 6,100 | 362 | 400 |  | NA | NA |
| delhi | 9,233 | 369 | 400 |  | NA | NA |
| gujarat | 5,223 | 358 | 400 | 4,598 | 355 | 400 |
| haryana | 2,044 | 324 | 350 | 348 | 183 | 200 |
| jammu & kashmir | 257 | 155 | 200 |  | NA | NA |
| rajasthan | 10,385 | 371 | 400 | 2 | 2 | 0 |
| tamil nadu | 2,394 | 332 | 350 | 166 | 117 | 150 |
| uttar pradesh | 31,982 | 380 | 400 | 67 | 58 | 60 |
| uttarakhand | 5,754 | 361 | 400 | 94 | 76 | 80 |
| **Total** | **73,372** | **3,012** | **3,300** | **5,275** | **791** | **890** |
| ***Note:*** 1) Drug Regimen definitions: 6H refers to 6 month, daily dosage of isoniazid. 3HP refers to 12 weeks of weekly dosage of a combination of rifapentine and isoniazid | | | | | | |

#### Table S4

*Sampling details for Type of Intervention*

| **Type of Intervention** | **Eligible** | **Sample required for 95% C.I. & 5% Margin of error** | **Actual Sample** |
| --- | --- | --- | --- |
| CxR + Interferon Gamma Release Assay (IGRA) test | 3,571 | 347 | 654 |
| CxR only | 73,131 | 383 | 3,043 |
| CxR + Tuberculin skin test (TST) /Mantoux test | 1,945 | 321 | 493 |
| **Total** | **78,647** | **383** | **4,190** |

#### Table S5

*Summary Statistics for HHCs who were reported to have died at the time of post-TPT follow ups; N = 14*

| **Characteristic** | N = 14*1* |
| --- | --- |
| **Gender** |  |
| female | 10 (71%) |
| male | 4 (29%) |
| transgender | 0 (0%) |
| **Age** |  |
| Median (Q1, Q3) | 59 (39, 65) |
| Mean | 52 |
| **Age.Category** |  |
| 2. 6-15 | 1 (7.1%) |
| 3. >15 | 13 (93%) |
| **State** |  |
| bihar | 2 (14%) |
| gujarat | 5 (36%) |
| haryana | 3 (21%) |
| rajasthan | 1 (7.1%) |
| tamil.nadu | 3 (21%) |
| **HHC is (Relationship)** |  |
| parent/parent-in-law | 8 (57%) |
| relative/others | 3 (21%) |
| spouse | 2 (14%) |
| unknown | 1 (7.1%) |
| **Occupation** |  |
| agri & livestock | 1 (7.1%) |
| homemaker | 10 (71%) |
| salaried | 1 (7.1%) |
| student | 2 (14%) |
| **Type House** |  |
| concrete | 4 (29%) |
| mixed | 6 (43%) |
| unknown | 4 (29%) |
| **Type Cooking Fuel** |  |
| both | 3 (21%) |
| clean | 6 (43%) |
| unclean | 1 (7.1%) |
| unknown | 4 (29%) |
| ***Household Contact - Pre-TPT Diagnostics:*** | |
| **Pre-TPT Testing - CxR** | 13 (93%) |
| **CxR Test Results** |  |
| cxr not suggestive | 13 (100%) |
| cxr suggestive | 0 (0%) |
| Asymptomatic | 14 (100%) |
| ***TPT Details*** | |
| **Drug Regimen** |  |
| 3HP (12-weeks-weekly rifapentine +isoniazid) | 6 (43%) |
| 6H (6-months-daily isoniazid) | 8 (57%) |
| **Time to TPT initiation (from diag of index patient)** |  |
| Median (Q1, Q3) | 111 (58, 177) |
| Mean | 122 |
| **TPT.completion.days - 3HP** |  |
| Median (Q1, Q3) | 100 (84, 110) |
| Mean | 98 |
| **TPT.completion.days - 6H** |  |
| Median (Q1, Q3) | 188 (181, 217) |
| Mean | 198 |
| ***Risk Factors*** | |
| No Risk Factors | 12 (86%) |
| Risk - Urban Slum | 2 (14%) |
| ***Comorbidities*** | |
| No Illness | 8 (57%) |
| Illness - Diabetes | 3 (21%) |
| Illness - Hypertension | 2 (14%) |
| Illness - Cardio | 1 (7.1%) |
| Illness - Bronchial | 2 (14%) |
| ***Lifestyle Risks*** | |
| Alcohol | 0 (0%) |
| Tobacco | 1 (7.1%) |
| *1 n (%)* | |

#### Table S6

*Regional Variations among selected covariates, N = 4012*

| **Characteristic** | **bihar** | **delhi** | **gujarat** | **haryana** | **jammu.&.kashmir** | **rajasthan** | **tamil.nadu** | **uttar.pradesh** | **uttarakhand** | **p-value***2* |
| --- | --- | --- | --- | --- | --- | --- | --- | --- | --- | --- |
| N = 384*1* | N = 355*1* | N = 770*1* | N = 515*1* | N = 193*1* | N = 396*1* | N = 483*1* | N = 445*1* | N = 471*1* |
| **Symptomatic** |  |  |  |  |  |  |  |  |  | <0.001*** |
| died | 2 (0.5%) | 0 (0%) | 5 (0.6%) | 3 (0.6%) | 0 (0%) | 1 (0.3%) | 3 (0.6%) | 0 (0%) | 0 (0%) |  |
| non-symptomatic | 325 (85%) | 336 (95%) | 706 (92%) | 479 (93%) | 185 (96%) | 335 (85%) | 454 (94%) | 382 (86%) | 456 (97%) |  |
| symptomatic | 57 (15%) | 19 (5.4%) | 59 (7.7%) | 33 (6.4%) | 8 (4.1%) | 60 (15%) | 26 (5.4%) | 63 (14%) | 15 (3.2%) |  |
| **Symptomatic + TB status** |  |  |  |  |  |  |  |  |  | <0.001*** |
| died | 2 (0.5%) | 0 (0%) | 5 (0.6%) | 3 (0.6%) | 0 (0%) | 1 (0.3%) | 3 (0.6%) | 0 (0%) | 0 (0%) |  |
| non-symptomatic | 325 (85%) | 336 (95%) | 706 (92%) | 479 (93%) | 185 (96%) | 335 (85%) | 454 (94%) | 382 (86%) | 456 (97%) |  |
| symptomatic | 57 (15%) | 16 (4.5%) | 54 (7.0%) | 29 (5.6%) | 7 (3.6%) | 55 (14%) | 26 (5.4%) | 61 (14%) | 13 (2.8%) |  |
| tb positive | 0 (0%) | 3 (0.8%) | 5 (0.6%) | 4 (0.8%) | 1 (0.5%) | 5 (1.3%) | 0 (0%) | 2 (0.4%) | 2 (0.4%) |  |
| **Gender** |  |  |  |  |  |  |  |  |  | 0.3 |
| female | 192 (50%) | 166 (47%) | 381 (49%) | 263 (51%) | 97 (50%) | 222 (56%) | 264 (55%) | 231 (52%) | 241 (51%) |  |
| male | 192 (50%) | 189 (53%) | 389 (51%) | 252 (49%) | 96 (50%) | 174 (44%) | 218 (45%) | 214 (48%) | 230 (49%) |  |
| transgender | 0 (0%) | 0 (0%) | 0 (0%) | 0 (0%) | 0 (0%) | 0 (0%) | 1 (0.2%) | 0 (0%) | 0 (0%) |  |
| **Age** |  |  |  |  |  |  |  |  |  | <0.001*** |
| Median (Q1, Q3) | 15 (8, 30) | 25 (15, 39) | 27 (14, 42) | 20 (4, 36) | 22 (5, 42) | 21 (11, 36) | 30 (16, 44) | 21 (11, 36) | 23 (12, 40) |  |
| Mean | 20 | 27 | 28 | 23 | 25 | 25 | 31 | 24 | 27 |  |
| **Age.Category** |  |  |  |  |  |  |  |  |  | <0.001*** |
| 1. <=5 | 72 (19%) | 18 (5.1%) | 83 (11%) | 144 (28%) | 56 (29%) | 43 (11%) | 42 (8.7%) | 56 (13%) | 47 (10.0%) |  |
| 2. 6-15 | 126 (33%) | 74 (21%) | 142 (18%) | 80 (16%) | 22 (11%) | 96 (24%) | 68 (14%) | 103 (23%) | 110 (23%) |  |
| 3. >15 | 186 (48%) | 263 (74%) | 545 (71%) | 291 (57%) | 115 (60%) | 257 (65%) | 373 (77%) | 286 (64%) | 314 (67%) |  |
| **HHC is (Relationship)** |  |  |  |  |  |  |  |  |  | <0.001*** |
| child | 5 (1.3%) | 4 (1.1%) | 14 (1.8%) | 9 (1.7%) | 0 (0%) | 12 (3.0%) | 17 (3.5%) | 7 (1.6%) | 48 (10%) |  |
| grandchild | 19 (4.9%) | 4 (1.1%) | 14 (1.8%) | 9 (1.7%) | 34 (18%) | 2 (0.5%) | 5 (1.0%) | 12 (2.7%) | 5 (1.1%) |  |
| grandparent | 0 (0%) | 0 (0%) | 3 (0.4%) | 1 (0.2%) | 1 (0.5%) | 0 (0%) | 0 (0%) | 2 (0.4%) | 0 (0%) |  |
| parent/parent-in-law | 142 (37%) | 171 (48%) | 357 (46%) | 200 (39%) | 79 (41%) | 157 (40%) | 180 (37%) | 129 (29%) | 165 (35%) |  |
| relative/others | 67 (17%) | 24 (6.8%) | 108 (14%) | 108 (21%) | 21 (11%) | 82 (21%) | 75 (16%) | 115 (26%) | 74 (16%) |  |
| sibling | 31 (8.1%) | 82 (23%) | 109 (14%) | 30 (5.8%) | 29 (15%) | 35 (8.8%) | 14 (2.9%) | 53 (12%) | 62 (13%) |  |
| son/daughter-in-law | 5 (1.3%) | 0 (0%) | 11 (1.4%) | 3 (0.6%) | 3 (1.6%) | 2 (0.5%) | 2 (0.4%) | 5 (1.1%) | 5 (1.1%) |  |
| spouse | 31 (8.1%) | 42 (12%) | 119 (15%) | 62 (12%) | 13 (6.7%) | 39 (9.8%) | 116 (24%) | 31 (7.0%) | 61 (13%) |  |
| unknown | 84 (22%) | 28 (7.9%) | 35 (4.5%) | 93 (18%) | 13 (6.7%) | 67 (17%) | 74 (15%) | 91 (20%) | 51 (11%) |  |
| **Occupation** |  |  |  |  |  |  |  |  |  | <0.001*** |
| agri & livestock | 16 (4.2%) | 11 (3.1%) | 30 (3.9%) | 34 (6.6%) | 21 (11%) | 37 (9.3%) | 38 (7.9%) | 29 (6.5%) | 25 (5.3%) |  |
| homemaker | 85 (22%) | 98 (28%) | 233 (30%) | 102 (20%) | 41 (21%) | 111 (28%) | 141 (29%) | 132 (30%) | 129 (27%) |  |
| labor | 51 (13%) | 62 (17%) | 163 (21%) | 73 (14%) | 12 (6.2%) | 52 (13%) | 101 (21%) | 56 (13%) | 68 (14%) |  |
| no information | 43 (11%) | 21 (5.9%) | 61 (7.9%) | 94 (18%) | 37 (19%) | 32 (8.1%) | 26 (5.4%) | 43 (9.7%) | 27 (5.7%) |  |
| salaried | 31 (8.1%) | 55 (15%) | 109 (14%) | 48 (9.3%) | 19 (9.8%) | 33 (8.3%) | 71 (15%) | 37 (8.3%) | 62 (13%) |  |
| student | 158 (41%) | 108 (30%) | 174 (23%) | 164 (32%) | 63 (33%) | 131 (33%) | 106 (22%) | 148 (33%) | 160 (34%) |  |
| **Type House** |  |  |  |  |  |  |  |  |  | <0.001*** |
| concrete | 99 (26%) | 291 (82%) | 476 (62%) | 242 (47%) | 122 (63%) | 175 (44%) | 244 (51%) | 230 (52%) | 268 (57%) |  |
| kaccha | 85 (22%) | 3 (0.8%) | 28 (3.6%) | 15 (2.9%) | 8 (4.1%) | 39 (9.8%) | 17 (3.5%) | 29 (6.5%) | 4 (0.8%) |  |
| mixed | 198 (52%) | 61 (17%) | 263 (34%) | 256 (50%) | 63 (33%) | 182 (46%) | 222 (46%) | 186 (42%) | 199 (42%) |  |
| unknown | 2 (0.5%) | 0 (0%) | 3 (0.4%) | 2 (0.4%) | 0 (0%) | 0 (0%) | 0 (0%) | 0 (0%) | 0 (0%) |  |
| **Type Cooking Fuel** |  |  |  |  |  |  |  |  |  | <0.001*** |
| both | 236 (61%) | 8 (2.3%) | 108 (14%) | 350 (68%) | 66 (34%) | 233 (59%) | 139 (29%) | 235 (53%) | 264 (56%) |  |
| clean | 43 (11%) | 335 (94%) | 565 (73%) | 133 (26%) | 121 (63%) | 91 (23%) | 314 (65%) | 163 (37%) | 193 (41%) |  |
| unclean | 103 (27%) | 12 (3.4%) | 94 (12%) | 30 (5.8%) | 6 (3.1%) | 72 (18%) | 30 (6.2%) | 47 (11%) | 14 (3.0%) |  |
| unknown | 2 (0.5%) | 0 (0%) | 3 (0.4%) | 2 (0.4%) | 0 (0%) | 0 (0%) | 0 (0%) | 0 (0%) | 0 (0%) |  |
| ***Pre TPT Screening*** | | | | | | | | | | |
| **CxR Done** | 337 (88%) | 330 (93%) | 645 (84%) | 358 (70%) | 133 (69%) | 361 (91%) | 411 (85%) | 379 (85%) | 433 (92%) | <0.001*** |
| **CxR Test Results** |  |  |  |  |  |  |  |  |  | 0.2 |
| cxr not suggestive | 328 (97%) | 325 (98%) | 638 (99%) | 350 (98%) | 131 (98%) | 353 (98%) | 400 (97%) | 376 (99%) | 429 (99%) |  |
| cxr suggestive | 9 (2.7%) | 5 (1.5%) | 7 (1.1%) | 8 (2.2%) | 2 (1.5%) | 8 (2.2%) | 11 (2.7%) | 3 (0.8%) | 4 (0.9%) |  |
| ***Pre TPT Symptomatic Screening*** | | | | | | | | | | |
| Symptoms = 0 | 355 (92%) | 353 (99%) | 737 (96%) | 514 (100%) | 177 (92%) | 390 (98%) | 479 (99%) | 435 (98%) | 438 (93%) |  |
| **(Before TPT) Sym Cough** | 24 (6.3%) | 2 (0.6%) | 19 (2.5%) | 0 (0%) | 16 (8.3%) | 3 (0.8%) | 4 (0.8%) | 3 (0.7%) | 23 (4.9%) | <0.001*** |
| **(Before TPT) Sym Weight Loss** | 1 (0.3%) | 0 (0%) | 3 (0.4%) | 0 (0%) | 0 (0%) | 1 (0.3%) | 0 (0%) | 0 (0%) | 3 (0.6%) | 0.3 |
| **(Before TPT) Sym Night Sweat** | 1 (0.3%) | 0 (0%) | 3 (0.4%) | 0 (0%) | 0 (0%) | 0 (0%) | 0 (0%) | 1 (0.2%) | 1 (0.2%) | 0.6 |
| **(Before TPT) Sym Fever** | 6 (1.6%) | 1 (0.3%) | 19 (2.5%) | 1 (0.2%) | 2 (1.0%) | 2 (0.5%) | 2 (0.4%) | 8 (1.8%) | 9 (1.9%) | 0.002** |
| ***TPT Details*** | | | | | | | | | | |
| **Drug Regimen** |  |  |  |  |  |  |  |  |  | <0.001*** |
| 3HP (12-weeks-weekly rifapentine +isoniazid) | 0 (0%) | 0 (0%) | 383 (50%) | 195 (38%) | 0 (0%) | 0 (0%) | 149 (31%) | 58 (13%) | 80 (17%) |  |
| 6H (6-months-daily isoniazid) | 384 (100%) | 355 (100%) | 387 (50%) | 320 (62%) | 193 (100%) | 396 (100%) | 334 (69%) | 387 (87%) | 391 (83%) |  |
| **Time to TPT initiation (from diag of index patient)** |  |  |  |  |  |  |  |  |  | <0.001*** |
| Median (Q1, Q3) | 108 (62, 164) | 38 (19, 63) | 78 (47, 121) | 63 (31, 105) | 22 (14, 31) | 52 (38, 77) | 56 (32, 98) | 60 (37, 107) | 55 (32, 109) |  |
| Mean | 114 | 45 | 93 | 80 | 25 | 61 | 71 | 83 | 78 |  |
| ***Post TPT Follow Up Details*** | | | | | | | | | | |
| **First Follow up Done** | 375 (98%) | 315 (89%) | 734 (95%) | 481 (93%) | 191 (99%) | 394 (99%) | 472 (98%) | 436 (98%) | 460 (98%) | <0.001*** |
| **Second Follow up Done** | 377 (98%) | 329 (93%) | 740 (96%) | 496 (96%) | 180 (93%) | 383 (97%) | 476 (99%) | 434 (98%) | 467 (99%) | <0.001*** |
| **First Follow up after (days since TPT completion)** |  |  |  |  |  |  |  |  |  | <0.001*** |
| Median (Q1, Q3) | 354 (315, 379) | 331 (301, 363) | 326 (297, 355) | 344 (317, 380) | 343 (315, 371) | 340 (300, 372) | 324 (298, 366) | 320 (286, 357) | 318 (297, 350) |  |
| Mean | 345 | 333 | 327 | 345 | 341 | 337 | 330 | 322 | 324 |  |
| missing data | 9 | 40 | 36 | 34 | 2 | 2 | 11 | 9 | 11 |  |
| **Second Follow up after (days since TPT completion)** |  |  |  |  |  |  |  |  |  | <0.001*** |
| Median (Q1, Q3) | 473 (438, 498) | 443 (408, 474) | 447 (420, 478) | 465 (432, 499) | 466 (434, 489) | 453 (415, 484) | 440 (412, 479) | 435 (401, 472) | 432 (409, 460) |  |
| Mean | 466 | 443 | 449 | 463 | 460 | 450 | 443 | 437 | 436 |  |
| missing data | 7 | 23 | 25 | 15 | 13 | 8 | 4 | 11 | 3 |  |
| **Follow Up Status** |  |  |  |  |  |  |  |  |  | <0.001*** |
| died | 2 (0.5%) | 0 (0%) | 5 (0.6%) | 3 (0.6%) | 0 (0%) | 1 (0.3%) | 3 (0.6%) | 0 (0%) | 0 (0%) |  |
| no TB sym | 325 (85%) | 336 (95%) | 706 (92%) | 479 (93%) | 185 (96%) | 335 (85%) | 454 (94%) | 382 (86%) | 456 (97%) |  |
| started ATT | 0 (0%) | 3 (0.8%) | 5 (0.6%) | 4 (0.8%) | 1 (0.5%) | 5 (1.3%) | 0 (0%) | 2 (0.4%) | 2 (0.4%) |  |
| symptomatic, no med consult | 52 (14%) | 7 (2.0%) | 28 (3.6%) | 11 (2.1%) | 6 (3.1%) | 37 (9.3%) | 18 (3.7%) | 26 (5.8%) | 6 (1.3%) |  |
| symptomatic, pending med consult | 5 (1.3%) | 3 (0.8%) | 16 (2.1%) | 6 (1.2%) | 1 (0.5%) | 15 (3.8%) | 6 (1.2%) | 33 (7.4%) | 7 (1.5%) |  |
| symptomatic, TB not diagnosed | 0 (0%) | 6 (1.7%) | 10 (1.3%) | 12 (2.3%) | 0 (0%) | 3 (0.8%) | 2 (0.4%) | 2 (0.4%) | 0 (0%) |  |
| ***Post TPT Symptomatic Screening*** | | | | | | | | | | |
| **Median Symptoms** |  |  |  |  |  |  |  |  |  |  |
| **Number of Symptoms:** |  |  |  |  |  |  |  |  |  | <0.001*** |
| Asymptomatic | 325 (85%) | 336 (95%) | 706 (92%) | 479 (94%) | 185 (96%) | 335 (85%) | 454 (95%) | 382 (86%) | 456 (97%) |  |
| Symptoms = 1 | 44 (12%) | 12 (3.4%) | 29 (3.8%) | 19 (3.7%) | 8 (4.1%) | 35 (8.9%) | 19 (4.0%) | 44 (9.9%) | 11 (2.3%) |  |
| Symptoms = 2 | 11 (2.9%) | 4 (1.1%) | 24 (3.1%) | 6 (1.2%) | 0 (0%) | 22 (5.6%) | 7 (1.5%) | 15 (3.4%) | 4 (0.8%) |  |
| Symptoms = 3 | 2 (0.5%) | 3 (0.8%) | 5 (0.7%) | 4 (0.8%) | 0 (0%) | 2 (0.5%) | 0 (0%) | 2 (0.4%) | 0 (0%) |  |
| Symptoms = 4 | 0 (0%) | 0 (0%) | 1 (0.1%) | 4 (0.8%) | 0 (0%) | 1 (0.3%) | 0 (0%) | 2 (0.4%) | 0 (0%) |  |
| **Individual Symptoms:** |  |  |  |  |  |  |  |  |  |  |
| Sym Cough | 23 (6.0%) | 14 (3.9%) | 52 (6.8%) | 26 (5.0%) | 5 (2.6%) | 43 (11%) | 18 (3.7%) | 24 (5.4%) | 7 (1.5%) | <0.001*** |
| Sym Weight Loss | 2 (0.5%) | 3 (0.8%) | 10 (1.3%) | 12 (2.3%) | 0 (0%) | 9 (2.3%) | 4 (0.8%) | 7 (1.6%) | 2 (0.4%) | 0.032* |
| Sym Night Sweat | 2 (0.5%) | 1 (0.3%) | 1 (0.1%) | 6 (1.2%) | 0 (0%) | 1 (0.3%) | 0 (0%) | 4 (0.9%) | 1 (0.2%) | 0.052 |
| Sym Fever | 45 (12%) | 11 (3.1%) | 33 (4.3%) | 15 (2.9%) | 3 (1.6%) | 36 (9.1%) | 11 (2.3%) | 53 (12%) | 9 (1.9%) | <0.001*** |
| ***Medical Consultation, Diagnostic Assessment, and ATT Initiations*** | | | | | | | | | | |
| **TB Assessment** | 0 (0%) | 9 (2.5%) | 15 (1.9%) | 16 (3.1%) | 1 (0.5%) | 8 (2.0%) | 2 (0.4%) | 4 (0.9%) | 2 (0.4%) | <0.001*** |
| **Assessment Details for those who received consultation (N = 57)** | | | | | | |  |  |  | 0.051 |
| AFB/FNAC | 0 (NA%) | 0 (0%) | 2 (13%) | 2 (13%) | 0 (0%) | 2 (25%) | 1 (50%) | 1 (25%) | 2 (100%) |  |
| Clinical/CXR | 0 (NA%) | 5 (56%) | 12 (80%) | 10 (63%) | 0 (0%) | 2 (25%) | 1 (50%) | 2 (50%) | 0 (0%) |  |
| NAAT | 0 (NA%) | 2 (22%) | 1 (6.7%) | 3 (19%) | 0 (0%) | 3 (38%) | 0 (0%) | 1 (25%) | 0 (0%) |  |
| Other | 0 (NA%) | 2 (22%) | 0 (0%) | 1 (6.3%) | 1 (100%) | 1 (13%) | 0 (0%) | 0 (0%) | 0 (0%) |  |
| missing data | 384 | 346 | 755 | 499 | 192 | 388 | 481 | 441 | 469 |  |
| **TB Test done after (days since TPT completion)** |  |  |  |  |  |  |  |  |  | 0.3 |
| Median (Q1, Q3) | NA (NA, NA) | 212 (180, 300) | 337 (213, 370) | 351 (171, 376) | 70 (70, 70) | 179 (145, 264) | 245 (84, 405) | 305 (236, 415) | 154 (148, 159) |  |
| Mean | NA | 224 | 316 | 282 | 70 | 190 | 245 | 319 | 154 |  |
| **Days to ATT initiation (post TPT completion)** |  |  |  |  |  |  |  |  |  | 0.2 |
| Median (Q1, Q3) | NA (NA, NA) | 182 (93, 192) | 337 (217, 370) | 214 (121, 314) | 75 (75, 75) | 159 (134, 243) | NA (NA, NA) | 326 (236, 415) | 156 (153, 159) |  |
| Mean | NA | 156 | 317 | 217 | 75 | 181 | NA | 326 | 156 |  |
| ***Risk Factors***** | | | | | | | | | | |
| None | 341 (89%) | 274 (77%) | 489 (64%) | 426 (83%) | 163 (84%) | 303 (77%) | 416 (86%) | 389 (87%) | 438 (93%) | <0.001*** |
| Healthcare worker | 0 (0%) | 3 (0.8%) | 2 (0.3%) | 2 (0.4%) | 0 (0%) | 4 (1.0%) | 2 (0.4%) | 5 (1.1%) | 0 (0%) | 0.082 |
| Migrant | 23 (6.0%) | 15 (4.2%) | 71 (9.2%) | 22 (4.3%) | 4 (2.1%) | 22 (5.6%) | 13 (2.7%) | 4 (0.9%) | 14 (3.0%) | <0.001*** |
| Construction | 10 (2.6%) | 2 (0.6%) | 17 (2.2%) | 10 (1.9%) | 0 (0%) | 11 (2.8%) | 17 (3.5%) | 8 (1.8%) | 2 (0.4%) | 0.004** |
| Miner | 6 (1.6%) | 13 (3.7%) | 2 (0.3%) | 2 (0.4%) | 0 (0%) | 2 (0.5%) | 1 (0.2%) | 4 (0.9%) | 4 (0.8%) | <0.001*** |
| Tribal | 2 (0.5%) | 12 (3.4%) | 10 (1.3%) | 2 (0.4%) | 27 (14%) | 54 (14%) | 1 (0.2%) | 2 (0.4%) | 2 (0.4%) | <0.001*** |
| Refugee | 0 (0%) | 0 (0%) | 0 (0%) | 0 (0%) | 0 (0%) | 0 (0%) | 0 (0%) | 1 (0.2%) | 1 (0.2%) | 0.6 |
| Prisoner | 0 (0%) | 1 (0.3%) | 1 (0.1%) | 0 (0%) | 0 (0%) | 1 (0.3%) | 0 (0%) | 0 (0%) | 1 (0.2%) | 0.8 |
| Urban Slum | 9 (2.3%) | 37 (10%) | 212 (28%) | 56 (11%) | 1 (0.5%) | 16 (4.0%) | 35 (7.2%) | 39 (8.8%) | 16 (3.4%) | <0.001*** |
| ***Comorbidities***** | | | | | | | | | | |
| No Comorbidities | 378 (98%) | 340 (96%) | 724 (94%) | 494 (96%) | 180 (93%) | 382 (96%) | 424 (88%) | 424 (95%) | 456 (97%) | <0.001*** |
| Diabetes | 1 (0.3%) | 8 (2.3%) | 26 (3.4%) | 3 (0.6%) | 7 (3.6%) | 3 (0.8%) | 47 (9.7%) | 9 (2.0%) | 9 (1.9%) | <0.001*** |
| Hypertension | 2 (0.5%) | 6 (1.7%) | 22 (2.9%) | 13 (2.5%) | 10 (5.2%) | 9 (2.3%) | 29 (6.0%) | 10 (2.2%) | 8 (1.7%) | <0.001*** |
| Kidney | 1 (0.3%) | 0 (0%) | 1 (0.1%) | 0 (0%) | 0 (0%) | 0 (0%) | 0 (0%) | 2 (0.4%) | 0 (0%) | 0.3 |
| Liver | 1 (0.3%) | 1 (0.3%) | 0 (0%) | 1 (0.2%) | 0 (0%) | 2 (0.5%) | 0 (0%) | 0 (0%) | 0 (0%) | 0.3 |
| Cardio | 1 (0.3%) | 0 (0%) | 0 (0%) | 2 (0.4%) | 0 (0%) | 0 (0%) | 5 (1.0%) | 1 (0.2%) | 0 (0%) | 0.011* |
| Bronchial | 0 (0%) | 0 (0%) | 3 (0.4%) | 4 (0.8%) | 0 (0%) | 2 (0.5%) | 1 (0.2%) | 1 (0.2%) | 2 (0.4%) | 0.5 |
| Cancer | 0 (0%) | 0 (0%) | 1 (0.1%) | 0 (0%) | 0 (0%) | 0 (0%) | 0 (0%) | 0 (0%) | 0 (0%) | 0.8 |
| ***Lifestyle Factors***** | | | | | | | | | | |
| **Alcohol** | 6 (1.6%) | 11 (3.1%) | 10 (1.3%) | 16 (3.1%) | 0 (0%) | 10 (2.5%) | 21 (4.3%) | 17 (3.8%) | 10 (2.1%) | 0.004** |
| **Tobacco** | 44 (11%) | 29 (8.2%) | 157 (20%) | 34 (6.6%) | 22 (11%) | 58 (15%) | 29 (6.0%) | 77 (17%) | 15 (3.2%) | <0.001*** |
| *1* n (%) | | | | | | | | | | |
| *2* *p<0.05; **p<0.01; ***p<0.001 | | | | | | | | | | |

#### Table S7

*Demographic variations based on number of symptoms; N = 340*

| **Characteristic** | **1** | **2** | **3** | **4** | **p-value***2* |
| --- | --- | --- | --- | --- | --- |
| N = 221*1* | N = 93*1* | N = 18*1* | N = 8*1* |
| **Symptomatic + TB status** |  |  |  |  | <0.001*** |
| symptomatic | 218 (99%) | 83 (89%) | 11 (61%) | 6 (75%) |  |
| tb positive | 3 (1.4%) | 10 (11%) | 7 (39%) | 2 (25%) |  |
| **Gender** |  |  |  |  | 0.056 |
| female | 114 (52%) | 52 (56%) | 9 (50%) | 8 (100%) |  |
| male | 107 (48%) | 41 (44%) | 9 (50%) | 0 (0%) |  |
| **Age** |  |  |  |  | 0.2 |
| Median (Q1, Q3) | 19 (9, 39) | 18 (9, 36) | 22 (14, 35) | 10 (3, 20) |  |
| Mean | 25 | 23 | 27 | 12 |  |
| **Age.Category** |  |  |  |  | 0.2 |
| 1. <=5 | 36 (16%) | 17 (18%) | 1 (5.6%) | 4 (50%) |  |
| 2. 6-15 | 54 (24%) | 24 (26%) | 5 (28%) | 1 (13%) |  |
| 3. >15 | 131 (59%) | 52 (56%) | 12 (67%) | 3 (38%) |  |
| **State** |  |  |  |  | 0.4 |
| bihar | 44 (20%) | 11 (12%) | 2 (11%) | 0 (0%) |  |
| delhi | 12 (5.4%) | 4 (4.3%) | 3 (17%) | 0 (0%) |  |
| gujarat | 29 (13%) | 24 (26%) | 5 (28%) | 1 (13%) |  |
| haryana | 19 (8.6%) | 6 (6.5%) | 4 (22%) | 4 (50%) |  |
| jammu.&.kashmir | 8 (3.6%) | 0 (0%) | 0 (0%) | 0 (0%) |  |
| rajasthan | 35 (16%) | 22 (24%) | 2 (11%) | 1 (13%) |  |
| tamil.nadu | 19 (8.6%) | 7 (7.5%) | 0 (0%) | 0 (0%) |  |
| uttar.pradesh | 44 (20%) | 15 (16%) | 2 (11%) | 2 (25%) |  |
| uttarakhand | 11 (5.0%) | 4 (4.3%) | 0 (0%) | 0 (0%) |  |
| **Type House** |  |  |  |  | 0.2 |
| concrete | 101 (46%) | 53 (57%) | 10 (56%) | 3 (38%) |  |
| kaccha | 17 (7.7%) | 10 (11%) | 2 (11%) | 2 (25%) |  |
| mixed | 103 (47%) | 30 (32%) | 6 (33%) | 3 (38%) |  |
| **Type Cooking Fuel** |  |  |  |  | 0.2 |
| both | 114 (52%) | 38 (41%) | 8 (44%) | 4 (50%) |  |
| clean | 85 (38%) | 40 (43%) | 8 (44%) | 1 (13%) |  |
| unclean | 22 (10.0%) | 15 (16%) | 2 (11%) | 3 (38%) |  |
| **Pre-TPT Testing - CxR** | 192 (87%) | 76 (82%) | 16 (89%) | 5 (63%) | 0.2 |
| **CxR Test Results** |  |  |  |  | 0.13 |
| cxr not suggestive | 186 (97%) | 75 (99%) | 14 (88%) | 5 (100%) |  |
| cxr suggestive | 6 (3.1%) | 1 (1.3%) | 2 (13%) | 0 (0%) |  |
| **Drug Regimen** |  |  |  |  | 0.5 |
| 3HP (12-weeks-weekly rifapentine +isoniazid) | 30 (14%) | 16 (17%) | 3 (17%) | 0 (0%) |  |
| 6H (6-months-daily isoniazid) | 191 (86%) | 77 (83%) | 15 (83%) | 8 (100%) |  |
| **Time to TPT initiation (from diag of index patient)** |  |  |  |  | 0.8 |
| Median (Q1, Q3) | 68 (38, 107) | 77 (37, 135) | 76 (33, 151) | 84 (46, 99) |  |
| Mean | 81 | 88 | 93 | 74 |  |
| **TPT.completion.days - 3HP** |  |  |  |  | 0.5 |
| Median (Q1, Q3) | 84 (84, 91) | 89 (84, 92) | 84 (84, 91) | NA (NA, NA) |  |
| Mean | 89 | 92 | 86 | NA |  |
| **TPT.completion.days - 6H** |  |  |  |  | 0.4 |
| Median (Q1, Q3) | 180 (179, 188) | 181 (179, 191) | 180 (179, 183) | 180 (180, 183) |  |
| Mean | 187 | 196 | 183 | 183 |  |
| **Follow Up Status** |  |  |  |  | 0.055 |
| started ATT | 3 (1.4%) | 10 (11%) | 7 (39%) | 2 (25%) |  |
| symptomatic, no med consult | 138 (62%) | 46 (49%) | 6 (33%) | 1 (13%) |  |
| symptomatic, pending med consult | 58 (26%) | 28 (30%) | 4 (22%) | 2 (25%) |  |
| symptomatic, TB not diagnosed | 22 (10.0%) | 9 (9.7%) | 1 (5.6%) | 3 (38%) |  |
| **(Before TPT) Asymptomatic** | 205 (93%) | 91 (98%) | 17 (94%) | 7 (88%) | 0.3 |
| **(Before TPT) Sym Cough** | 12 (5.4%) | 1 (1.1%) | 1 (5.6%) | 1 (13%) | 0.2 |
| **(Before TPT) Sym Weight Loss** | 1 (0.5%) | 1 (1.1%) | 0 (0%) | 0 (0%) | 0.9 |
| **(Before TPT) Sym Night Sweat** | 0 (0%) | 0 (0%) | 0 (0%) | 0 (0%) |  |
| **(Before TPT) Sym Fever** | 4 (1.8%) | 1 (1.1%) | 0 (0%) | 1 (13%) | 0.12 |
| ***Risk Factors*** | | | | | |
| **No Risk Factors** | 175 (79%) | 78 (84%) | 12 (67%) | 6 (75%) | 0.4 |
| **Risk - Healthcare worker** | 2 (0.9%) | 0 (0%) | 1 (5.6%) | 0 (0%) | 0.15 |
| **Risk - Migrant** | 13 (5.9%) | 1 (1.1%) | 1 (5.6%) | 0 (0%) | 0.3 |
| **Risk - Construction** | 9 (4.1%) | 2 (2.2%) | 1 (5.6%) | 0 (0%) | 0.7 |
| **Risk - Miner** | 6 (2.7%) | 0 (0%) | 0 (0%) | 0 (0%) | 0.4 |
| **Risk - Tribal** | 8 (3.6%) | 1 (1.1%) | 0 (0%) | 1 (13%) | 0.2 |
| **Risk - Refugee** | 0 (0%) | 0 (0%) | 0 (0%) | 0 (0%) |  |
| **Risk - Prisoner** | 2 (0.9%) | 0 (0%) | 0 (0%) | 0 (0%) | 0.8 |
| **Risk - Urban Slum** | 22 (10.0%) | 12 (13%) | 3 (17%) | 1 (13%) | 0.8 |
| ***Comorbidities*** | | | | | |
| No Comorbidities | 203 (92%) | 85 (91%) | 17 (94%) | 8 (100%) |  |
| Diabetes | 7 (3.2%) | 1 (1.1%) | 1 (5.6%) | 0 (0%) | 0.6 |
| Hypertension | 9 (4.1%) | 7 (7.5%) | 0 (0%) | 0 (0%) | 0.4 |
| Kidney | 0 (0%) | 1 (1.1%) | 0 (0%) | 0 (0%) | 0.4 |
| Liver | 3 (1.4%) | 0 (0%) | 0 (0%) | 0 (0%) | 0.7 |
| Cardio | 0 (0%) | 1 (1.1%) | 0 (0%) | 0 (0%) | 0.4 |
| Bronchial | 2 (0.9%) | 1 (1.1%) | 1 (5.6%) | 0 (0%) | 0.4 |
| Cancer | 0 (0%) | 0 (0%) | 0 (0%) | 0 (0%) |  |
| ***Lifestyle Risks*** | | | | | |
| **Alcohol** | 8 (3.6%) | 1 (1.1%) | 2 (11%) | 0 (0%) | 0.2 |
| **Tobacco** | 27 (12%) | 14 (15%) | 6 (33%) | 0 (0%) | 0.055 |
| ***Post TPT Symptom Screening*** | | | | | |
| **Sym Cough** | 103 (47%) | 84 (90%) | 17 (94%) | 8 (100%) | <0.001*** |
| **Sym Weight Loss** | 12 (5.4%) | 14 (15%) | 15 (83%) | 8 (100%) | <0.001*** |
| **Sym Night Sweat** | 1 (0.5%) | 3 (3.2%) | 4 (22%) | 8 (100%) | <0.001*** |
| **Sym Fever** | 105 (48%) | 85 (91%) | 18 (100%) | 8 (100%) | <0.001*** |
| **TB Assessment** | 25 (11%) | 19 (20%) | 8 (44%) | 5 (63%) | <0.001*** |
| **TB Diagnostics - Type (detailed)** |  |  |  |  | 0.2 |
| AFB/FNAC | 4 (16%) | 5 (26%) | 0 (0%) | 1 (20%) |  |
| Clinical/CXR | 17 (68%) | 9 (47%) | 3 (38%) | 3 (60%) |  |
| NAAT | 1 (4.0%) | 3 (16%) | 5 (63%) | 1 (20%) |  |
| Other | 3 (12%) | 2 (11%) | 0 (0%) | 0 (0%) |  |
| **TB Test done after (days since TPT completion)** |  |  |  |  | >0.9 |
| Median (Q1, Q3) | 242 (159, 393) | 261 (148, 343) | 181 (164, 301) | 271 (171, 370) |  |
| Mean | 247 | 252 | 214 | 271 |  |
| **Days to ATT initiation (post TPT completion)** |  |  |  |  | 0.8 |
| Median (Q1, Q3) | 159 (75, 243) | 227 (134, 367) | 182 (159, 252) | 273 (175, 370) |  |
| Mean | 159 | 242 | 204 | 273 |  |
| *1* n (%) | | | | | |
| *2* *p<0.05; **p<0.01; ***p<0.001 | | | | | |

#### Table S8

*Demographic variations based on drug regimen; N = 4,012*

| **Characteristic** | **3HP (12-weeks-weekly rifapentine +isoniazid)** | **6H (6-months-daily isoniazid)** | **p-value***2* |
| --- | --- | --- | --- |
| N = 865*1* | N = 3,147*1* |
| **Symptomatic** |  |  | <0.001*** |
| died | 6 (0.7%) | 8 (0.3%) |  |
| non-symptomatic | 810 (94%) | 2,848 (90%) |  |
| symptomatic | 49 (5.7%) | 291 (9.2%) |  |
| **Symptomatic + TB status** |  |  | <0.001*** |
| died | 6 (0.7%) | 8 (0.3%) |  |
| non-symptomatic | 810 (94%) | 2,848 (90%) |  |
| symptomatic | 48 (5.5%) | 270 (8.6%) |  |
| tb positive | 1 (0.1%) | 21 (0.7%) |  |
| **Follow Up Status** |  |  | <0.001*** |
| died | 6 (0.7%) | 8 (0.3%) |  |
| no TB sym | 810 (94%) | 2,848 (90%) |  |
| started ATT | 1 (0.1%) | 21 (0.7%) |  |
| symptomatic, no med consult | 30 (3.5%) | 161 (5.1%) |  |
| symptomatic, pending med consult | 8 (0.9%) | 84 (2.7%) |  |
| symptomatic, TB not diagnosed | 10 (1.2%) | 25 (0.8%) |  |
| **Symptoms (N)** |  |  | <0.001*** |
| Median (Q1, Q3) | 0.00 (0.00, 0.00) | 0.00 (0.00, 0.00) |  |
| Mean | 0.08 | 0.13 |  |
| **Sym Cough** | 43 (5.0%) | 169 (5.4%) | 0.6 |
| **Sym Weight Loss** | 7 (0.8%) | 42 (1.3%) | 0.2 |
| **Sym Night Sweat** | 1 (0.1%) | 15 (0.5%) | 0.14 |
| **Sym Fever** | 20 (2.3%) | 196 (6.2%) | <0.001*** |
| *1* n (%) | | | |
| *2* *p<0.05; **p<0.01; ***p<0.001 | | | |

#### Table S9

*Regional Variations, among symptomatic; N = 340*

| **Characteristic** | **bihar** | **delhi** | **gujarat** | **haryana** | **jammu.&.kashmir** | **rajasthan** | **tamil.nadu** | **uttar.pradesh** | **uttarakhand** | **p-value***2* |
| --- | --- | --- | --- | --- | --- | --- | --- | --- | --- | --- |
| N = 57*1* | N = 19*1* | N = 59*1* | N = 33*1* | N = 8*1* | N = 60*1* | N = 26*1* | N = 63*1* | N = 15*1* |
| **Symptomatic + TB status** |  |  |  |  |  |  |  |  |  | 0.09 |
| symptomatic | 57 (100%) | 16 (84%) | 54 (92%) | 29 (88%) | 7 (88%) | 55 (92%) | 26 (100%) | 61 (97%) | 13 (87%) |  |
| tb positive | 0 (0%) | 3 (16%) | 5 (8.5%) | 4 (12%) | 1 (13%) | 5 (8.3%) | 0 (0%) | 2 (3.2%) | 2 (13%) |  |
| **Drug Regimen** |  |  |  |  |  |  |  |  |  | <0.001*** |
| 3HP (12-weeks-weekly rifapentine +isoniazid) | 0 (0%) | 0 (0%) | 32 (54%) | 10 (30%) | 0 (0%) | 0 (0%) | 6 (23%) | 1 (1.6%) | 0 (0%) |  |
| 6H (6-months-daily isoniazid) | 57 (100%) | 19 (100%) | 27 (46%) | 23 (70%) | 8 (100%) | 60 (100%) | 20 (77%) | 62 (98%) | 15 (100%) |  |
| **Symptoms (N)** |  |  |  |  |  |  |  |  |  | 0.011* |
| Median (Q1, Q3) | 1.00 (1.00, 1.00) | 1.00 (1.00, 2.00) | 2.00 (1.00, 2.00) | 1.00 (1.00, 2.00) | 1.00 (1.00, 1.00) | 1.00 (1.00, 2.00) | 1.00 (1.00, 2.00) | 1.00 (1.00, 2.00) | 1.00 (1.00, 2.00) |  |
| Mean | 1.26 | 1.53 | 1.63 | 1.79 | 1 | 1.48 | 1.27 | 1.4 | 1.27 |  |
| **Symptoms (categorical)** |  |  |  |  |  |  |  |  |  | 0.011* |
| 1 | 44 (77%) | 12 (63%) | 29 (49%) | 19 (58%) | 8 (100%) | 35 (58%) | 19 (73%) | 44 (70%) | 11 (73%) |  |
| 2 | 11 (19%) | 4 (21%) | 24 (41%) | 6 (18%) | 0 (0%) | 22 (37%) | 7 (27%) | 15 (24%) | 4 (27%) |  |
| 3 | 2 (3.5%) | 3 (16%) | 5 (8.5%) | 4 (12%) | 0 (0%) | 2 (3.3%) | 0 (0%) | 2 (3.2%) | 0 (0%) |  |
| 4 | 0 (0%) | 0 (0%) | 1 (1.7%) | 4 (12%) | 0 (0%) | 1 (1.7%) | 0 (0%) | 2 (3.2%) | 0 (0%) |  |
| **Sym Cough** | 23 (40%) | 14 (74%) | 52 (88%) | 26 (79%) | 5 (63%) | 43 (72%) | 18 (69%) | 24 (38%) | 7 (47%) | <0.001*** |
| **Sym Weight Loss** | 2 (3.5%) | 3 (16%) | 10 (17%) | 12 (36%) | 0 (0%) | 9 (15%) | 4 (15%) | 7 (11%) | 2 (13%) | 0.008** |
| **Sym Night Sweat** | 2 (3.5%) | 1 (5.3%) | 1 (1.7%) | 6 (18%) | 0 (0%) | 1 (1.7%) | 0 (0%) | 4 (6.3%) | 1 (6.7%) | 0.020* |
| **Sym Fever** | 45 (79%) | 11 (58%) | 33 (56%) | 15 (45%) | 3 (38%) | 36 (60%) | 11 (42%) | 53 (84%) | 9 (60%) | <0.001*** |
| **Housing** |  |  |  |  |  |  |  |  |  | <0.001*** |
| concrete | 9 (16%) | 15 (79%) | 34 (58%) | 18 (55%) | 4 (50%) | 29 (48%) | 13 (50%) | 33 (52%) | 12 (80%) |  |
| kaccha | 13 (23%) | 0 (0%) | 5 (8.5%) | 3 (9.1%) | 0 (0%) | 3 (5.0%) | 1 (3.8%) | 6 (9.5%) | 0 (0%) |  |
| mixed | 35 (61%) | 4 (21%) | 20 (34%) | 12 (36%) | 4 (50%) | 28 (47%) | 12 (46%) | 24 (38%) | 3 (20%) |  |
| **Fuel** |  |  |  |  |  |  |  |  |  | <0.001*** |
| both | 43 (75%) | 1 (5.3%) | 9 (15%) | 18 (55%) | 3 (38%) | 40 (67%) | 6 (23%) | 36 (57%) | 8 (53%) |  |
| clean | 2 (3.5%) | 16 (84%) | 39 (66%) | 12 (36%) | 5 (63%) | 15 (25%) | 20 (77%) | 18 (29%) | 7 (47%) |  |
| unclean | 12 (21%) | 2 (11%) | 11 (19%) | 3 (9.1%) | 0 (0%) | 5 (8.3%) | 0 (0%) | 9 (14%) | 0 (0%) |  |
| *1* n (%) |  |  |  |  |  |  |  |  |  |  |
| *2* *p<0.05; **p<0.01; ***p<0.001 |  |  |  |  |  |  |  |  |  |  |

#### Table S10

*Differences based on Housing Type; among the symptomatic cohort; N = 340*

| **Characteristic** | **concrete** | **kaccha** | **mixed** | **p-value***2* |
| --- | --- | --- | --- | --- |
| N = 167*1* | N = 31*1* | N = 142*1* |
| **TB Assessment** | 35 (21%) | 4 (13%) | 18 (13%) | 0.13 |
| **TB Positive Overall** | 15 (9.0%) | 1 (3.2%) | 6 (4.2%) | 0.2 |
| **TB Positive within those consulted** | 15 (43%) | 1 (25%) | 6 (33%) | 0.7 |
| not consulted | 132 | 27 | 124 |  |
| **Symptoms (N)** |  |  |  | 0.044* |
| Median (Q1, Q3) | 1.00 (1.00, 2.00) | 1.00 (1.00, 2.00) | 1.00 (1.00, 2.00) |  |
| Mean | 1.49 | 1.65 | 1.36 |  |
| **Fuel** |  |  |  | <0.001*** |
| both | 61 (37%) | 14 (45%) | 89 (63%) |  |
| clean | 96 (57%) | 4 (13%) | 34 (24%) |  |
| unclean | 10 (6.0%) | 13 (42%) | 19 (13%) |  |
| **TB Diagnostics - Type (detailed)** |  |  |  | 0.4 |
| AFB/FNAC | 6 (17%) | 0 (0%) | 4 (22%) |  |
| Clinical/CXR | 18 (51%) | 3 (75%) | 11 (61%) |  |
| NAAT | 7 (20%) | 0 (0%) | 3 (17%) |  |
| Other | 4 (11%) | 1 (25%) | 0 (0%) |  |
| missing data | 132 | 27 | 124 |  |
| **State** |  |  |  | 0.002** |
| bihar | 9 (5.4%) | 13 (42%) | 35 (25%) |  |
| delhi | 15 (9.0%) | 0 (0%) | 4 (2.8%) |  |
| gujarat | 34 (20%) | 5 (16%) | 20 (14%) |  |
| haryana | 18 (11%) | 3 (9.7%) | 12 (8.5%) |  |
| jammu.&.kashmir | 4 (2.4%) | 0 (0%) | 4 (2.8%) |  |
| rajasthan | 29 (17%) | 3 (9.7%) | 28 (20%) |  |
| tamil.nadu | 13 (7.8%) | 1 (3.2%) | 12 (8.5%) |  |
| uttar.pradesh | 33 (20%) | 6 (19%) | 24 (17%) |  |
| uttarakhand | 12 (7.2%) | 0 (0%) | 3 (2.1%) |  |
| *1 n (%)* | | | | |
| *2 *p<0.05; **p<0.01; ***p<0.001* | | | | |

#### Table S11

*Differences based on Cooking Fuel Usage; among the symptomatic cohort; N = 340*

| **Characteristic** | **both** | **clean** | **unclean** | **p-value***2* |
| --- | --- | --- | --- | --- |
| N = 164*1* | N = 134*1* | N = 42*1* |
| **TB Assessment** | 16 (9.8%) | 35 (26%) | 6 (14%) | <0.001*** |
| **TB Positive Overall** | 5 (3.0%) | 15 (11%) | 2 (4.8%) | 0.016* |
| **TB Positive within those consulted** | 5 (31%) | 15 (43%) | 2 (33%) | 0.7 |
| missing data | 148 | 99 | 36 |  |
| **Symptoms (N)** |  |  |  | 0.1 |
| Median (Q1, Q3) | 1.00 (1.00, 2.00) | 1.00 (1.00, 2.00) | 1.00 (1.00, 2.00) |  |
| Mean | 1.4 | 1.44 | 1.67 |  |
| **Housing** |  |  |  | <0.001*** |
| concrete | 61 (37%) | 96 (72%) | 10 (24%) |  |
| kaccha | 14 (8.5%) | 4 (3.0%) | 13 (31%) |  |
| mixed | 89 (54%) | 34 (25%) | 19 (45%) |  |
| **TB Diagnostics - Type (detailed)** |  |  |  | 0.8 |
| AFB/FNAC | 3 (19%) | 6 (17%) | 1 (17%) |  |
| Clinical/CXR | 7 (44%) | 21 (60%) | 4 (67%) |  |
| NAAT | 5 (31%) | 4 (11%) | 1 (17%) |  |
| Other | 1 (6.3%) | 4 (11%) | 0 (0%) |  |
| **State** |  |  |  | 0.063 |
| bihar | 43 (26%) | 2 (1.5%) | 12 (29%) |  |
| delhi | 1 (0.6%) | 16 (12%) | 2 (4.8%) |  |
| gujarat | 9 (5.5%) | 39 (29%) | 11 (26%) |  |
| haryana | 18 (11%) | 12 (9.0%) | 3 (7.1%) |  |
| jammu.&.kashmir | 3 (1.8%) | 5 (3.7%) | 0 (0%) |  |
| rajasthan | 40 (24%) | 15 (11%) | 5 (12%) |  |
| tamil.nadu | 6 (3.7%) | 20 (15%) | 0 (0%) |  |
| uttar.pradesh | 36 (22%) | 18 (13%) | 9 (21%) |  |
| uttarakhand | 8 (4.9%) | 7 (5.2%) | 0 (0%) |  |
| *1 n (%)* | | | | |
| *2 *p<0.05; **p<0.01; ***p<0.001* | | | | |

#### Table S12

*Results from Logistic Regression; Binary Variable = Whether or not a TB assessment was done.*

| Dependent Variable: Medical Consultation Done | | |
| --- | --- | --- |
|  | HC1 Robust SE | Clustered SE (state) |
|  | Model 1 | Model 2 |
| age | 1 | 1 |
|  | (0.98, 1.02) | (0.98, 1.03) |
| gendermale | 1.33 | 1.33 |
|  | (0.41, 2.26) | (-0.14, 2.80) |
| sym.n | 9.14*** | 9.14*** |
|  | (6.49, 11.78) | (6.80, 11.48) |
| type.housingkaccha | 0.58 | 0.58 |
|  | (-0.60, 1.76) | (-0.57, 1.73) |
| type.housingmixed | 0.92 | 0.92 |
|  | (0.18, 1.65) | (0.13, 1.71) |
| type.cooking.fuelclean | 3.64*** | 3.64*** |
|  | (0.54, 6.74) | (0.20, 7.08) |
| type.cooking.fuelunclean | 1.06 | 1.06 |
|  | (-0.53, 2.65) | (-0.85, 2.97) |
| Constant | 0.001*** | 0.001*** |
|  | (-0.0001, 0.003) | (-0.0004, 0.003) |
| Observations | 3,994 | 3,994 |
| Log Likelihood | -169.39 | -169.39 |
| Akaike Inf. Crit. | 354.77 | 354.77 |
| *Note:*p<0.1; **p<0.05; ***p<0.01* | | |

#### Table S13

*Performance of symptom-based screening algorithms under the assumption that all eligible individuals were tested. In practice, fewer than half sought medical consultation. Values shown assume complete testing to assess maximum possible diagnostic yield.*

| **Symptoms** | **Condition** | **Number of**  **Symptoms** | **HHCs** | **TB Diagnosed** | **Accuracy** | **Precision** | **Sensitivity** | **Specificity** |
| --- | --- | --- | --- | --- | --- | --- | --- | --- |
| **Sym Cough** |  |  | 212 | 21 | 43.5% | 9.9% | 95.5% | 39.9% |
|  |  |  |  |  | (38.4%, 48.8%) | (6.6%, 14.7%) | (78.2%, 99.2%) | (34.7%, 45.4%) |
| **Sym Weight Loss** |  |  | 49 | 10 | 85.0% | 20.4% | 45.5% | 87.7% |
|  |  |  |  |  | (80.8%, 88.4%) | (11.5%, 33.6%) | (26.9%, 65.3%) | (83.7%, 90.9%) |
| **Sym Night Sweat** |  |  | 16 | 3 | 90.6% | 18.8% | 13.6% | 95.9% |
|  |  |  |  |  | 87%, 93.3% | 6.6%, 43% | 4.7%, 33.3% | 93.1%, 97.6% |
| **Sym Fever** |  |  | 216 | 18 | 40.6% | 8.3% | 81.8% | 37.7% |
|  |  |  |  |  | (35.5%, 45.9%) | (5.3%, 12.8%) | (61.5%, 92.7%) | (32.6%, 43.2%) |
| **Cough & Weight Loss** |  |  | 29 | 10 | 90.9% | 34.5% | 45.5% | 94.0% |
|  |  |  |  |  | (87.3%, 93.5%) | (19.9%, 52.7%) | (26.9%, 65.3%) | (90.9%, 96.1%) |
| **Cough & Fever** |  |  | 101 | 17 | 73.8% | 16.8% | 77.3% | 73.6% |
|  |  |  |  |  | (68.9%, 78.2%) | (10.8%, 25.3%) | (56.6%, 89.9%) | (68.5%, 78.1%) |
| **Cough & Night Sweat** |  |  | 12 | 3 | 91.8% | 25.0% | 13.6% | 97.2% |
|  |  |  |  |  | (88.4%, 94.2%) | (8.9%, 53.2%) | (4.7%, 33.3%) | (94.7%, 98.5%) |
| **Weight Loss & Fever** |  |  | 30 | 8 | 89.4% | 26.7% | 36.4% | 93.1% |
|  |  |  |  |  | (85.7%, 92.3%) | (14.2%, 44.4%) | (19.7%, 57%) | (89.7%, 95.4%) |
| **Weight loss and night sweat** |  |  | 9 | 2 | 92.1% | 22.2% | 9.1% | 97.8% |
|  |  |  |  |  | (88.7%, 94.5%) | (6.3%, 54.7%) | (2.5%, 27.8%) | (95.5%, 98.9%) |
| **Fever and night sweat** |  |  | 14 | 3 | 91.2% | 21.4% | 13.6% | 96.5% |
|  |  |  |  |  | (87.7%, 93.7%) | (7.6%, 47.6%) | (4.7%, 33.3%) | (93.9%, 98.1%) |
| **Cough & Weight Loss** | **AND** | **>=3** | 22 | 8 | 91.8% | 36.4% | 36.4% | 95.6% |
|  |  |  |  |  | (88.4%, 94.2%) | (19.7%, 57%) | (19.7%, 57%) | (92.7%, 97.4%) |
| **Cough & Fever** | **AND** | **>=3** | 25 | 9 | 91.5% | 36.0% | 40.9% | 95.0% |
|  |  |  |  |  | (88%, 94%) | (20.2%, 55.5%) | (23.3%, 61.3%) | (92%, 96.9%) |
| **Cough & Night Sweat** | **AND** | **>=3** | 11 | 3 | 92.1% | 27.3% | 13.6% | 97.5% |
|  |  |  |  |  | (88.7%, 94.5%) | (9.7%, 56.6%) | (4.7%, 33.3%) | (95.1%, 98.7%) |
| **Weight Loss & Fever** | **AND** | **>=3** | 23 | 8 | 91.5% | 34.8% | 36.4% | 95.3% |
|  |  |  |  |  | (88%, 94%) | (18.8%, 55.1%) | (19.7%, 57%) | (92.4%, 97.1%) |
| **Weight Loss & Night Sweat** | **AND** | **>=3** | 9 | 2 | 92.1% | 22.2% | 9.1% | 97.8% |
|  |  |  |  |  | (88.7%, 94.5%) | (6.3%, 54.7%) | (2.5%, 27.8%) | (95.5%, 98.9%) |
|  |  | **>=3** | 26 | 9 | 91.2% | 34.6% | 40.9% | 94.7% |
|  |  |  |  |  | (87.7%, 93.7%) | (19.4%, 53.8%) | (23.3%, 61.3%) | (91.6%, 96.6%) |
|  |  | **>=2** | 119 | 19 | 69.7% | 16.0% | 86.4% | 68.6% |
|  |  |  |  |  | (64.6%, 74.3%) | (10.5%, 23.6%) | (66.7%, 95.3%) | (63.3%, 73.4%) |
| **Cough & Weight Loss** | **OR** | **>=3** | 33 | 11 | 90.3% | 33.3% | 50.0% | 93.1% |
|  |  |  |  |  | (86.7%, 93%) | (19.8%, 50.4%) | (30.7%, 69.3%) | (89.7%, 95.4%) |
| ***Note****: author has highlighted most cost-effective algorithms among those tested, which allow for >=35% sensitivity, or the share of TB population diagnosed, while ensuring precision of >=33%.* | | | | | | | | |

#### Table S14

*Results from logistic regression model; dependent variable = TB diagnosis*

**Identifying TB among post TPT cohort – Logistic Model**

Table S14 showcases five logistic regression models with TB diagnosis as the binary outcome variable. Given the low diagnosis rate (0.5% of the full cohort, N = 4,190; 0.9% of the symptomatic cohort, N = 340), the aim is to assess the relative strength of associations between indicators and TB diagnosis rather than to build a predictive model.

| **Logistic Regression Results (Odds Ratios displayed)** | | | | | |
| --- | --- | --- | --- | --- | --- |
| Dependent Variable: Positive TB Diagnosis | | | | | |
|  | Odds Ratios with Robust Standard Errors | | | | |
|  | **Model 1** *Number of Symptoms* | **Model 1** *Cough & Weight Loss* | **Model 3** *Number of Symptoms + Cough & Weight Loss* | **Model 4** *Socioeconomic covariates* | **Model 5** *Socioeconomic covariates & Full Symptom Profile* |
| age |  |  | 1.02* | 1.03* | 1.02 |
|  |  |  | (0.99, 1.05) | (1.00, 1.06) | (0.99, 1.05) |
| type.intervCxR + Tuberculin skin test (TST) /Mantoux test |  |  |  | 0.05** | 0.17 |
|  |  |  |  | (-2.31, 2.41) | (-1.94, 2.28) |
| type.intervCxR only |  |  |  | 0.05*** | 0.07*** |
|  |  |  |  | (-1.55, 1.65) | (-1.68, 1.82) |
| sym.n | 7.36*** |  | 2.85** | 11.77*** |  |
|  | (6.99, 7.73) |  | (1.95, 3.75) | (11.23, 12.31) |  |
| sym.recurr.cough |  | 251.93*** | 53.18*** |  | 119.49*** |
|  |  | (249.89, 253.97) | (50.44, 55.92) |  | (117.22, 121.76) |
| sym.wt.loss |  | 8.15*** | 1.83 |  | 5.59** |
|  |  | (7.18, 9.12) | (-0.02, 3.68) |  | (4.26, 6.92) |
| sym.night.sweat |  |  |  |  | 1.18 |
|  |  |  |  |  | (-1.29, 3.65) |
| sym.fever |  |  |  |  | 10.37*** |
|  |  |  |  |  | (8.67, 12.07) |
| diag.to.tpt |  |  |  | 1 | 1 |
|  |  |  |  | (0.99, 1.01) | (0.99, 1.01) |
| type.housingkaccha |  |  |  | 0.4 | 0.32 |
|  |  |  |  | (-2.95, 3.75) | (-2.65, 3.29) |
| type.housingmixed |  |  |  | 0.56 | 0.58 |
|  |  |  |  | (-0.85, 1.97) | (-0.68, 1.84) |
| type.cooking.fuelclean |  |  |  | 9.17*** | 5.51*** |
|  |  |  |  | (7.58, 10.76) | (4.21, 6.81) |
| type.cooking.fuelunclean |  |  |  | 0.56 | 1.21 |
|  |  |  |  | (-1.85, 2.97) | (-1.05, 3.47) |
| drug.regimen6H (6-months-daily isoniazid) |  |  |  | 28.15*** | 28.73*** |
|  |  |  |  | (26.33, 29.97) | (27.03, 30.43) |
| Constant | 0.00*** | 0.00*** | 0.00*** | 0.00*** | 0.00*** |
|  | (-0.61, 0.61) | (-1.96, 1.96) | (-2.30, 2.30) | (-2.71, 2.71) | (-2.94, 2.94) |
| Observations | 3,994 | 3,994 | 3,994 | 3,994 | 3,994 |
| Log Likelihood | -75.33 | -69.55 | -65.71 | -61.45 | -54.26 |
| Akaike Inf. Crit. | 154.66 | 145.09 | 141.42 | 144.9 | 136.52 |
| *Note:*p<0.1; **p<0.05; ***p<0.01* | | | | | |

# Figures

#### Figure S1

*
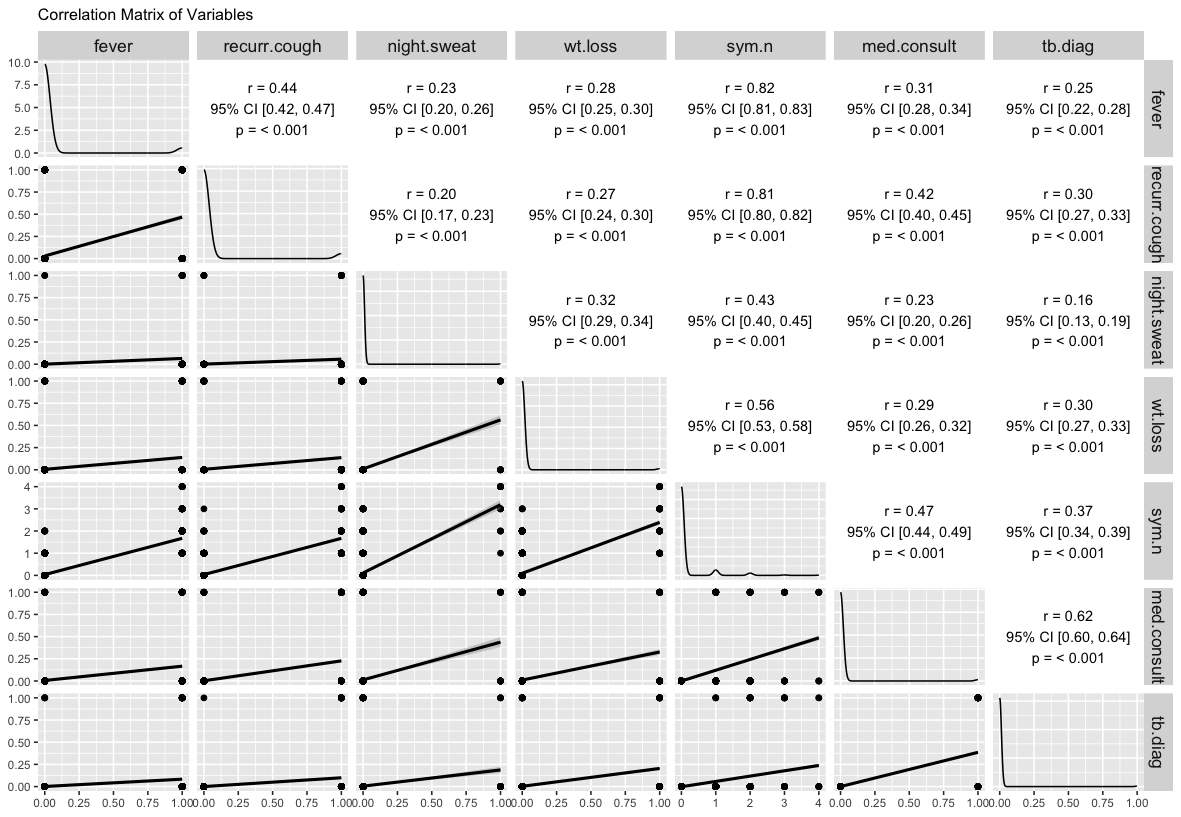
Correlation Plot of different symptoms. Medical consultation, and TB diagnosis*

#### Figure S2


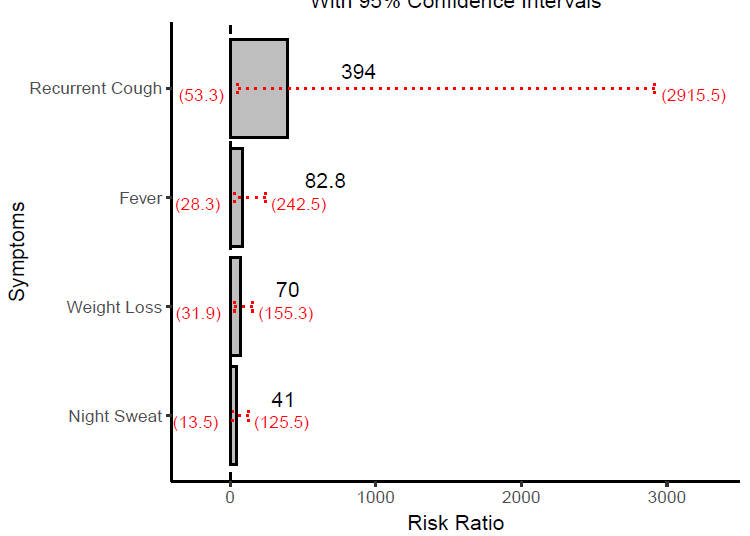
*Risk Ratios associated with each of the four symptoms, along with 95% C.I., investigated among post-TPT cohor*
